# Supplementary material for: Raising an Eye at Facial Muscle Morphology in Canids
Source: MDPI journal article supplement (doi:10.3390/biology13050290), 2024-04-25
Supplement: s1 [file s1]

## Supplemental Figures

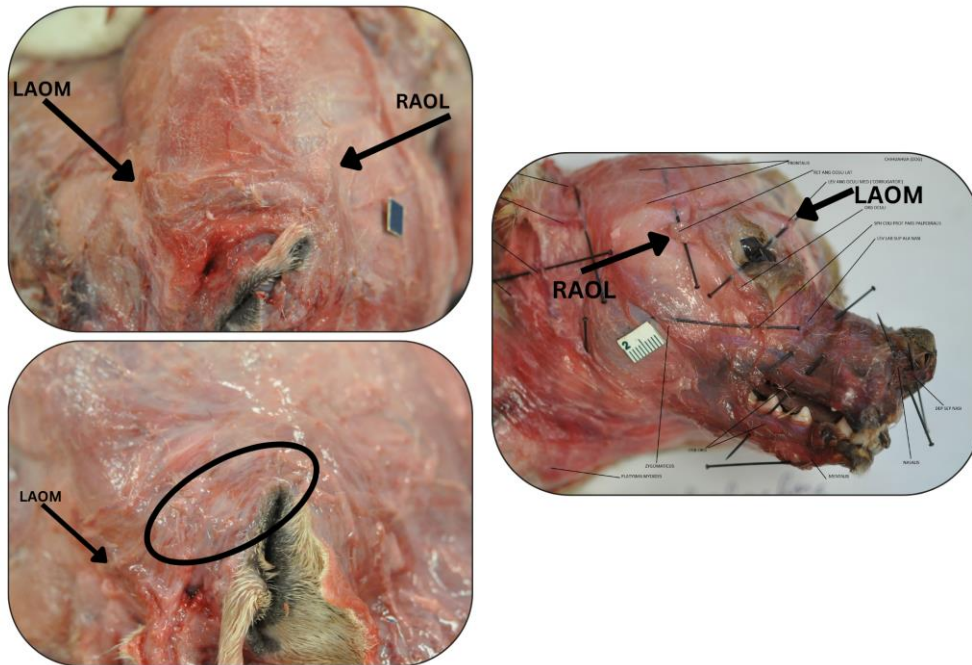

**Figure S1:** Specimen 1 – Dog (*C. familiaris*) adult/M (right); and Specimen 2 – Dog (*C. familiaris*) adult/M (top left) and detail of striated muscles on Specimen 2 (bottom left).

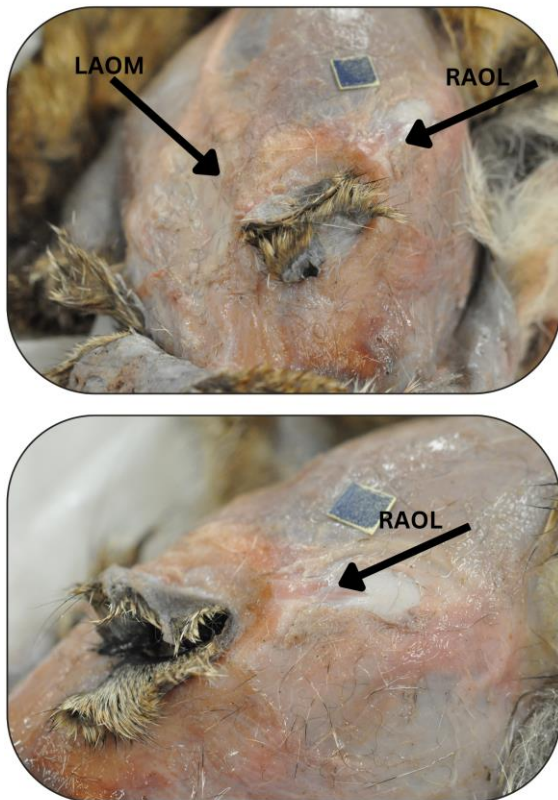

**Figure S2:** Specimen 3 – Coyote (*C. latrans*) young adult/F.

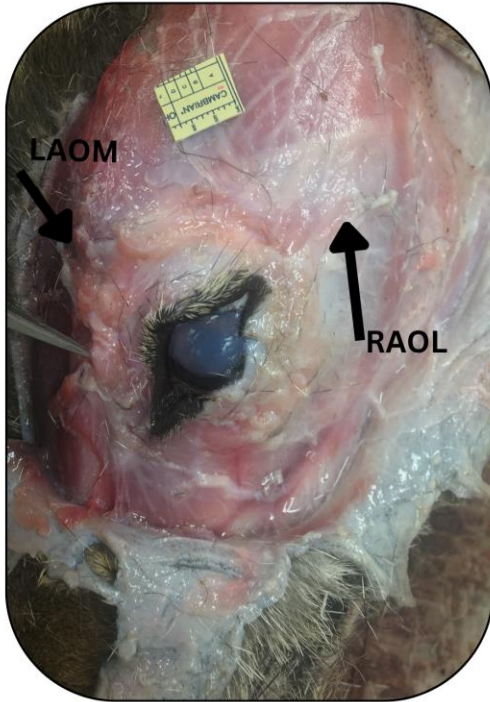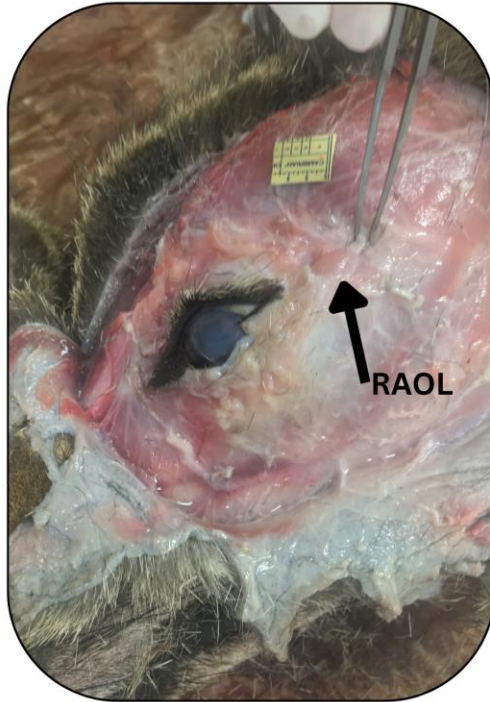

**Figure S3:** Specimen 4 – Coyote (*C. latrans*) adult/F.

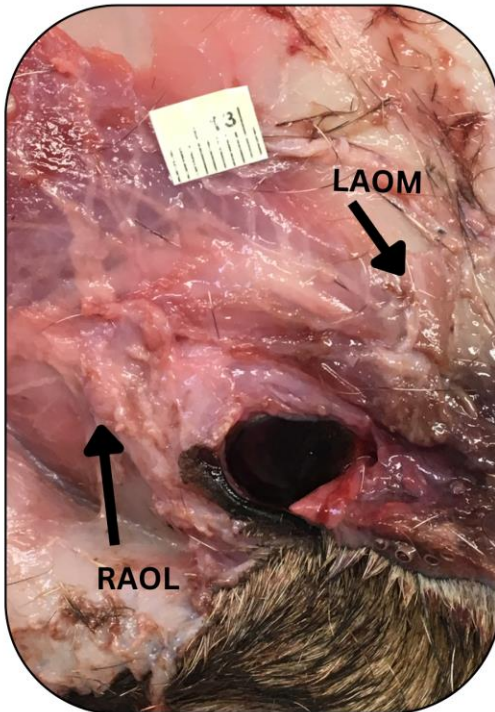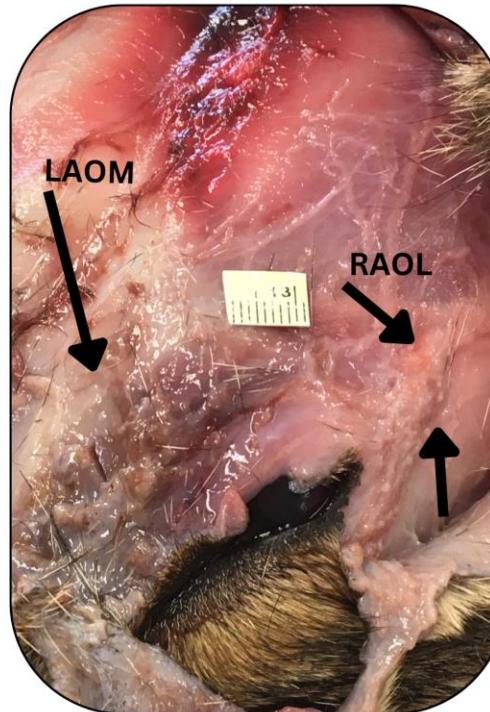

**Figure S4:** Specimen 5 – Coyote (*C. latrans*) adult/M.



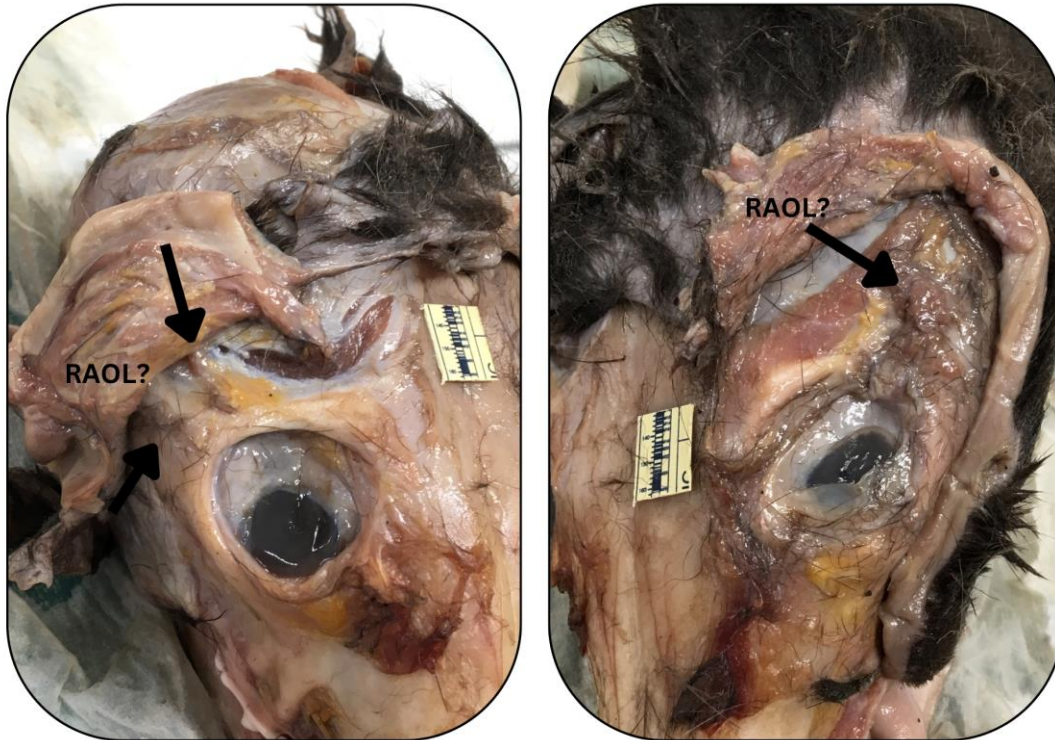

**Figure S5:** Specimen 6 – Arctic fox (*V. lagopus*) unk/unk.

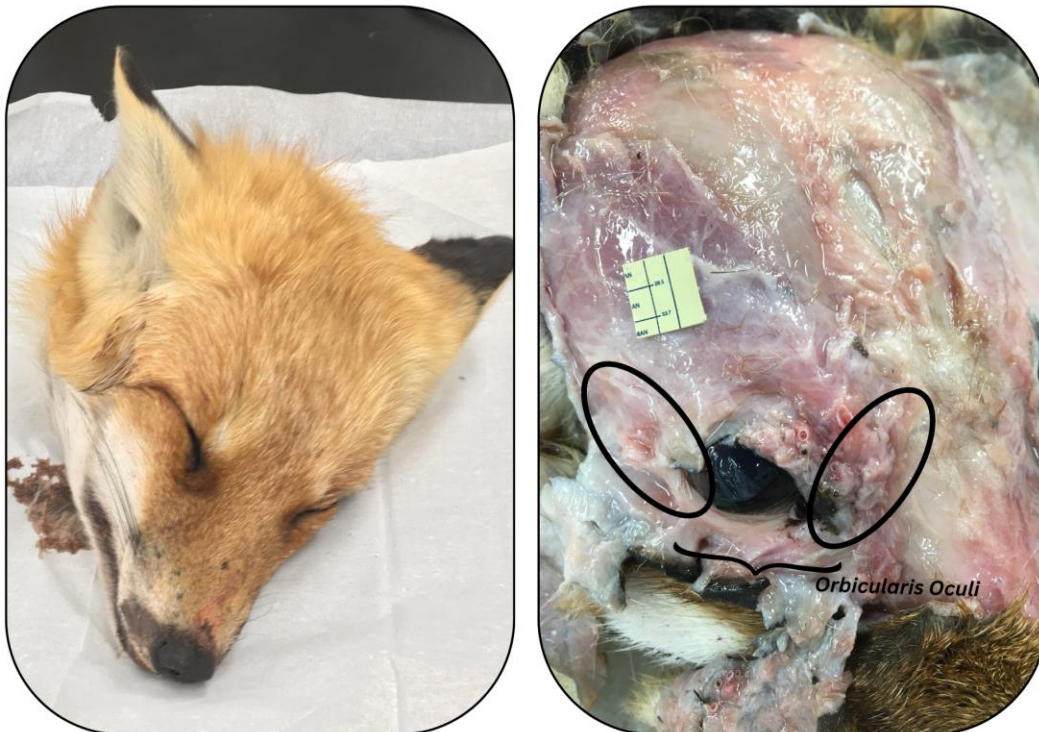

**Figure S6:** Specimen 7 – Red fox (*V. v. fulvus*) adult/F – the possible *retractor* seems indistinct from the *orbicularis*, as does the *levator* homolog.

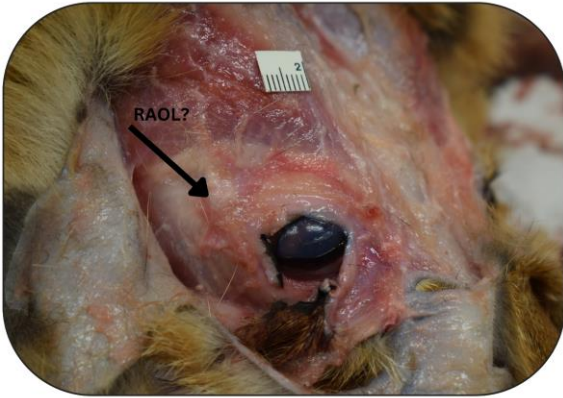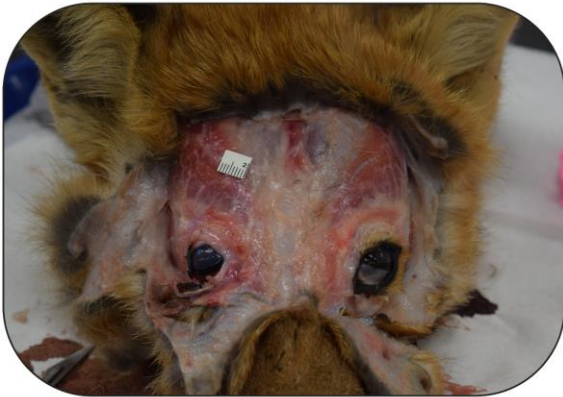

**Figure S7:** Specimen 8 – Red fox (*V. v. fulvus*) juvenile/M.

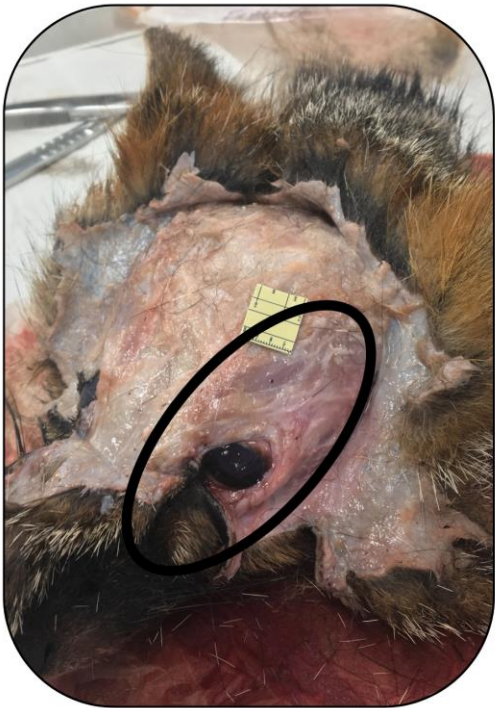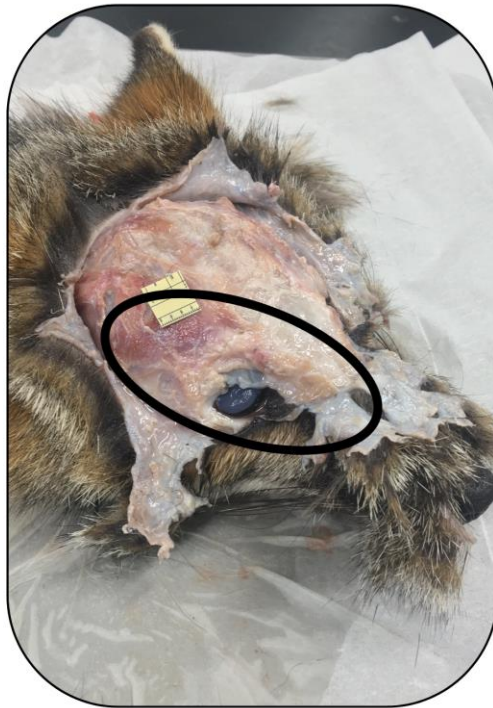

**Figure S8:** Specimen 9 – Gray fox (*U. cinereoargenteus*) adult/F (left); and Specimen 10 – Gray fox (*U. cinereoargenteus*) adult/M (right).
